# Supplementary material
Source: bioRxiv or medRxiv preprint supplement (http://medrxiv.stage.highwire.org/highwire/filestream/85759/field_highwire_adjunct_files/0/2020.06.12.20129999-1.pdf)
Supplement: Supplementary file [file 2020.06.12.20129999-1.pdf]

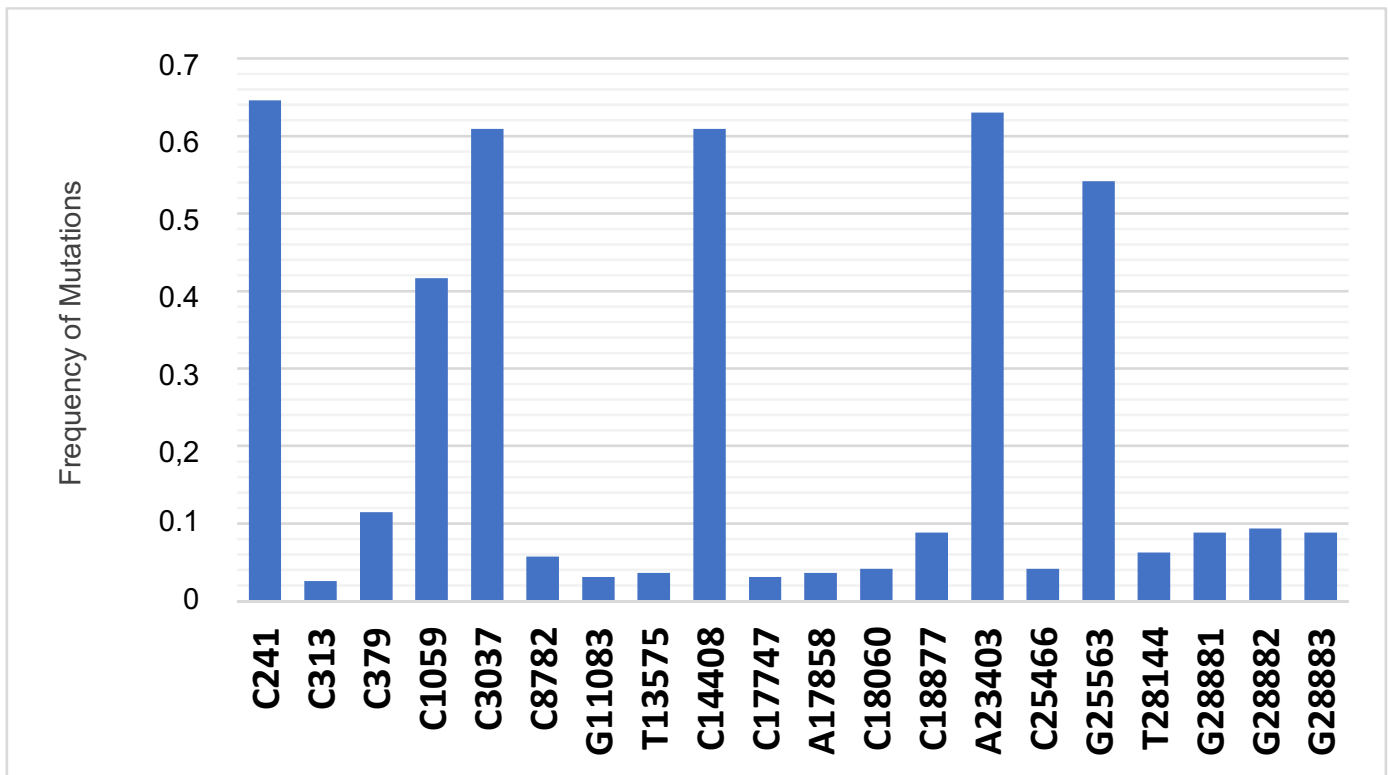

**Supplemental Figure 1.** Distribution of mutations for the top 20 mutated sites found in SARS-CoV2 genomes sampled from Cedars Sinai Medical Center patients in Los Angeles, USA, displayed as the nucleotide changes observed and the occurrence within all samples.

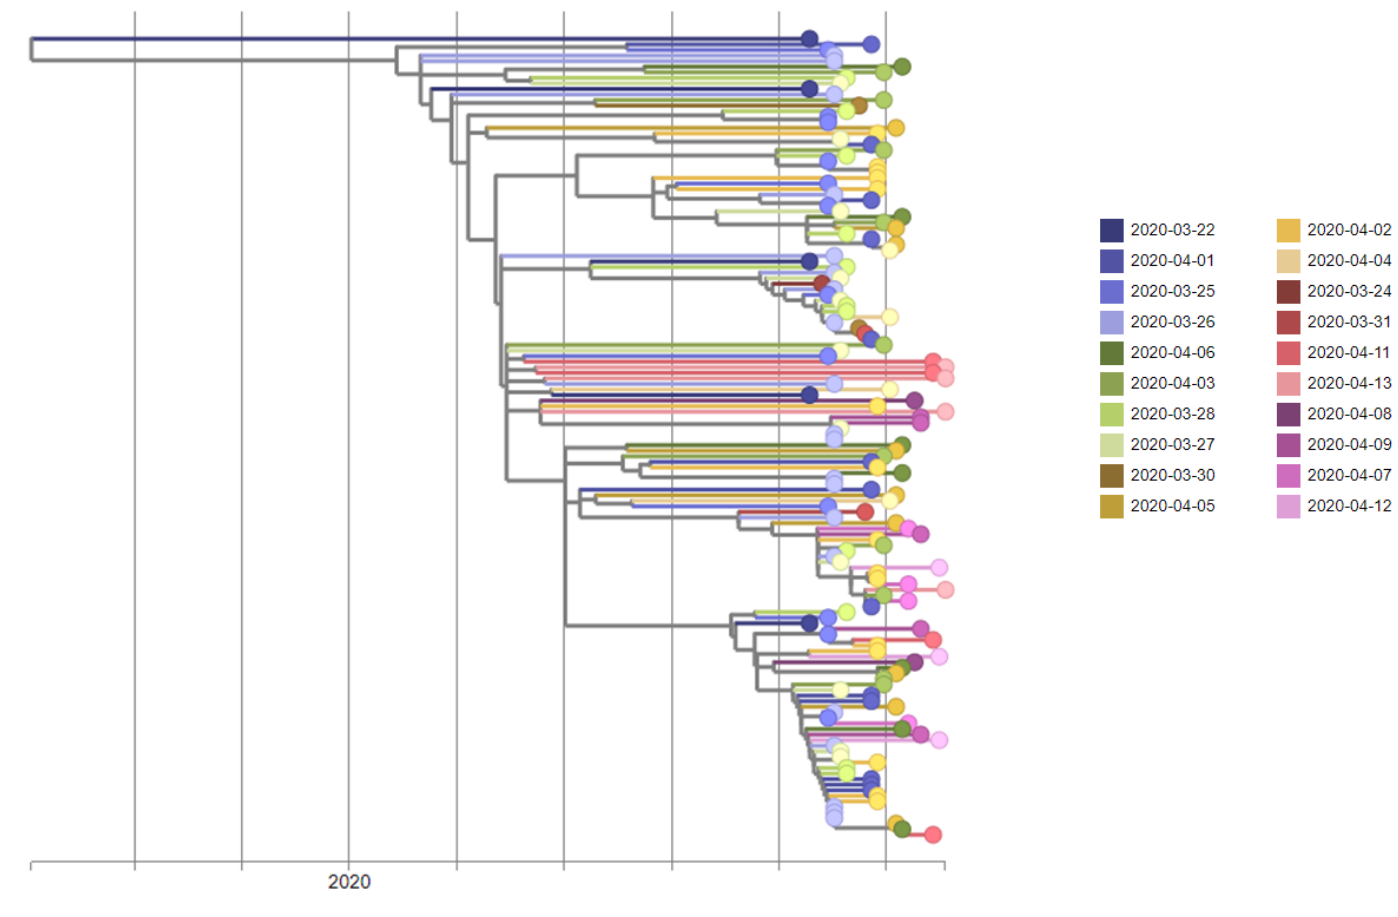

**Supplemental Figure 2.** Phylogenetic tree plotting 144 isolates collected from Cedars Sinai Medical Center based on their date of collection.

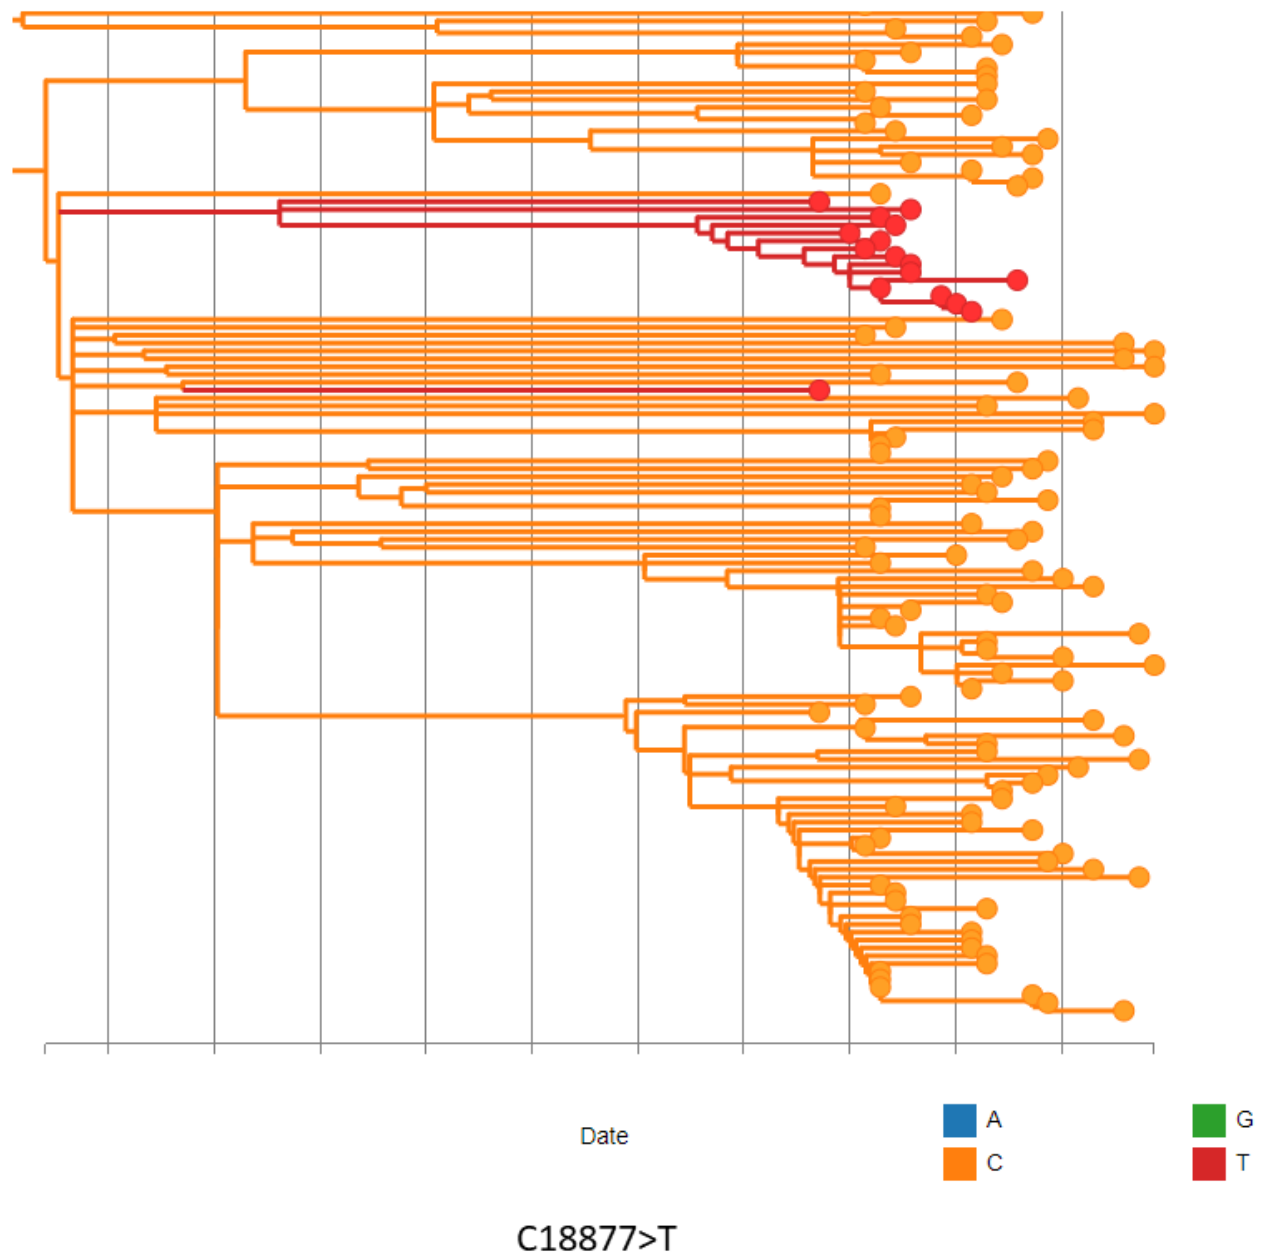

**Supplemental Figure 3.** Phylogenetic tree plotting the variant C18877T in the SARS-CoV-2 genome of 144 isolates collected from Cedars Sinai Medical Center. . Each nucleotide has a corresponding color code (A-blue, G-green, C-orange, T-red), Each histogram depicts one isolated cluster in which only those isolates contain this variant change.

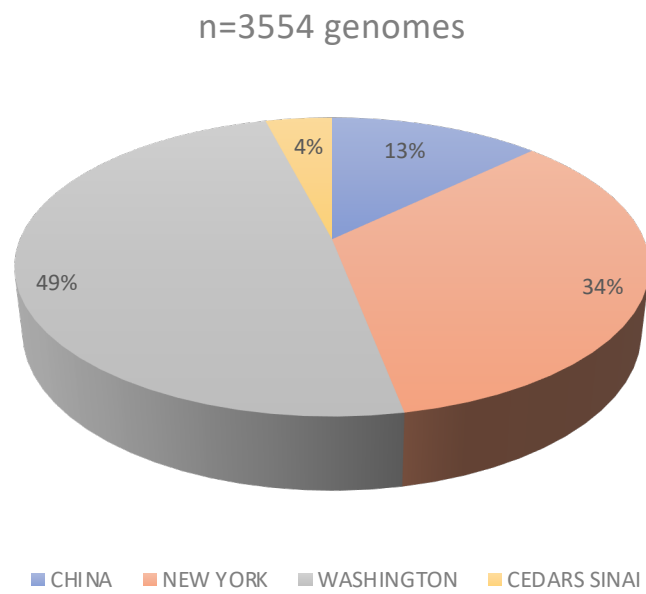

**Supplemental Figure 4.** Distribution of 3554 SARS-CoV-2 genomes used in this study by location.
